# Supplementary material for: Regional brain development analysis through registration using anisotropic similarity, a constrained affine transformation
Source: PubMed Central journal article supplement (PMC7039415; doi:10.1371/journal.pone.0214174), 2020-02-24
Supplement: pone.0214174.s001.pdf [file pone.0214174.s001.pdf]

## S1 Appendix - Detailed calculations for optimizing anisotropic similarity between two sets of paired points

### S1.1

Let  $R$  be a rotation matrix. Then, an associated unit quaternion  $q$  is defined such as if  $Rx = q * x * \bar{q}$ . Thus:

$$\begin{aligned}\tilde{C}(q, S) &= \sum_i \|y'_i - q * \xi_i * \bar{q}\|^2 \\ &= \sum_i \|y'_i * q - q * \xi_i\|^2\end{aligned}\tag{17}$$

### S1.2

If  $p$  is a vector, the associated quaternion is pure:  $p_1 = 0$  which implies that  $Q_p$  and  $P_p$  are skew-symmetric. Yet  $y'_i$  and  $\xi_i$  are vectors, thus:

$$\begin{aligned}\tilde{C}(q, S) &= \sum_i \|y'_i * q - q * \xi_i\|^2 \\ &= q^T \left( \sum_i (Q_{y'_i} + P_{\xi_i})^T (Q_{y'_i} + P_{\xi_i}) \right) q \\ &= q^T \left( - \sum_i (Q_{y'_i} + P_{\xi_i})^2 \right) q\end{aligned}\tag{18}$$

### S1.3

If  $p$  is a vector, the associated quaternion is pure:  $p_1 = 0$  which implies that  $Q_p$  and  $P_p$  are skew-symmetric and  $Q_p^2 = P_p^2 = -p^T p I_4$ .

Yet  $y'_i$  and  $\xi_i$  are vectors, thus:

$$\begin{aligned}\tilde{C}(q, S) &= -q^T \left( \sum_i (Q_{y'_i} + P_{\xi_i})^2 \right) q \\ &= -q^T \left( \sum_i (Q_{y'_i}^2 + 2Q_{y'_i} P_{\xi_i} + P_{\xi_i}^2) \right) q \\ &= -q^T \left( \sum_i (-y_i'^T y_i' I_4 + 2Q_{y'_i} P_{\xi_i} - \xi_i^T \xi_i I_4) \right) q \\ &= -q^T \left( \sum_i (-y_i'^T y_i' I_4 + 2Q_{y'_i} P_{\xi_i} - \tilde{x}_i^T S^2 \tilde{x}_i I_4) \right) q\end{aligned}\tag{19}$$

Thus:

$$\frac{\partial \tilde{C}}{\partial s_j} = -q^T \left( \sum_i (2Q_{y'_i} \frac{\partial P_{\xi_i}}{\partial s_j} - 2\tilde{x}_i^T s_j E_{jj} \tilde{x}_i) \right) q$$

$E_{jj}$  being the matrix with a 1 at the intersection of the  $j^{\text{th}}$  row and the  $j^{\text{th}}$  column and 0 elsewhere.

$$= -2q^T \left( \sum_i Q_{y'_i} \frac{\partial P_{\xi_i}}{\partial s_j} \right) q + 2q^T \left( s_j \sum_i \tilde{x}_{ji}^2 \right) q$$

yet  $\sum_i \tilde{x}_{ji}^2$  scalar and  $q^T q = 1$

$$= -q^T \left( \sum_i Q_{y'_i} \frac{\partial P_{\xi_i}}{\partial s_j} \right) q + s_j \sum_i \tilde{x}_{ji}^2$$

$$\frac{\partial \tilde{C}}{\partial s_j} = 0 \Leftrightarrow \hat{s}_j = \frac{1}{\sum_i \tilde{x}_{ji}^2} q^T \left( \sum_i Q_{y'_i} \frac{\partial P_{\xi_i}}{\partial s_j} \right) q$$

(20)

#### S1.4

$$Q_{y'_i} \frac{\partial P_{\xi_i}}{\partial s_1} = \tilde{x}_{1i} \begin{pmatrix} y'_{1i} & 0 & -y'_{3i} & y'_{2i} \\ 0 & y'_{1i} & y'_{2i} & y'_{3i} \\ -y'_{3i} & y'_{2i} & -y'_{1i} & 0 \\ y'_{2i} & y'_{3i} & 0 & -y'_{1i} \end{pmatrix}, \quad Q_{y'_i} \frac{\partial P_{\xi_i}}{\partial s_2} = \tilde{x}_{2i} \begin{pmatrix} y'_{2i} & y'_{3i} & 0 & -y'_{1i} \\ y'_{3i} & -y'_{2i} & y'_{1i} & 0 \\ 0 & y'_{1i} & y'_{2i} & y'_{3i} \\ -y'_{1i} & 0 & y'_{3i} & -y'_{2i} \end{pmatrix}$$

$$\text{and } Q_{y'_i} \frac{\partial P_{\xi_i}}{\partial s_3} = \tilde{x}_{3i} \begin{pmatrix} y'_{3i} & -y'_{2i} & y'_{1i} & 0 \\ -y'_{2i} & -y'_{3i} & 0 & y'_{1i} \\ y'_{1i} & 0 & -y'_{3i} & y'_{2i} \\ 0 & y'_{1i} & y'_{2i} & y'_{3i} \end{pmatrix}$$

(21)
